# Supplementary material for: Sustained aviremia despite anti-retroviral therapy non-adherence in male children after in utero HIV transmission
Source: Springer Nature journal article supplement (doi:10.1038/s41591-024-03105-4), 2024-06-06
Supplement: MOESM1 [file 41591_2024_3105_MOESM1_ESM.pdf]

# **Sustained aviremia despite anti-retroviral therapy non-adherence in male children after in utero HIV transmission**

---

In the format provided by the  
authors and unedited

Suppl Fig 1

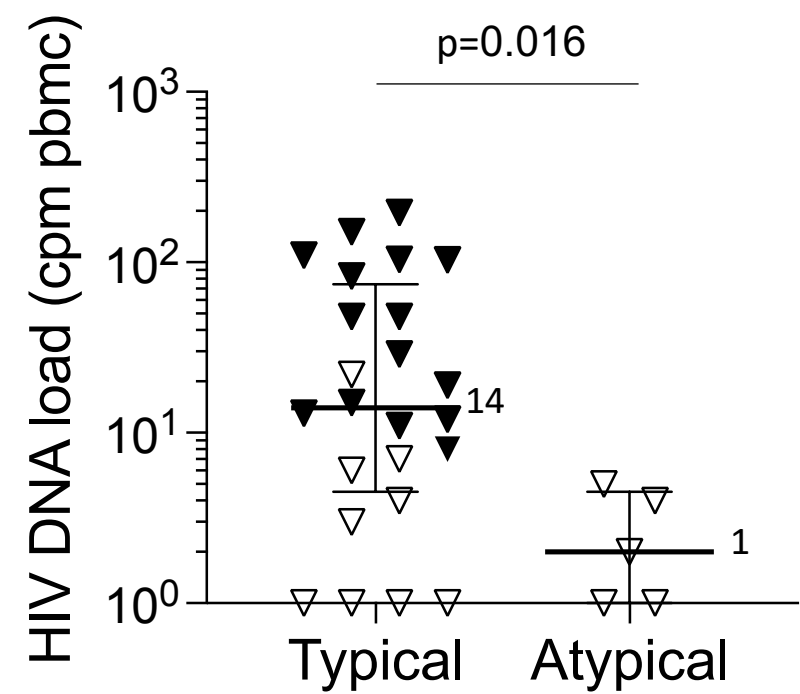

**Suppl Fig 1. Total HIV DNA loads in 25 age-matched ‘typical’ children compared to the 5 ‘atypical’ children analysed by ddPCR.** The age of the children at which total DNA load was analysed was 46m median (IQR 37-48m) in the ‘typical’ group (n=25) and 41m (median; IQR 36-44m) in the ‘atypical’ group (n=5). Open symbols represent DNA loads that were undetectable or not significantly different from undetectable, solid symbols represent total HIV DNA detected (HIV DNA copies/million PBMC). P value determined using the two-sided Mann-Whitney U test.

Suppl Fig 2

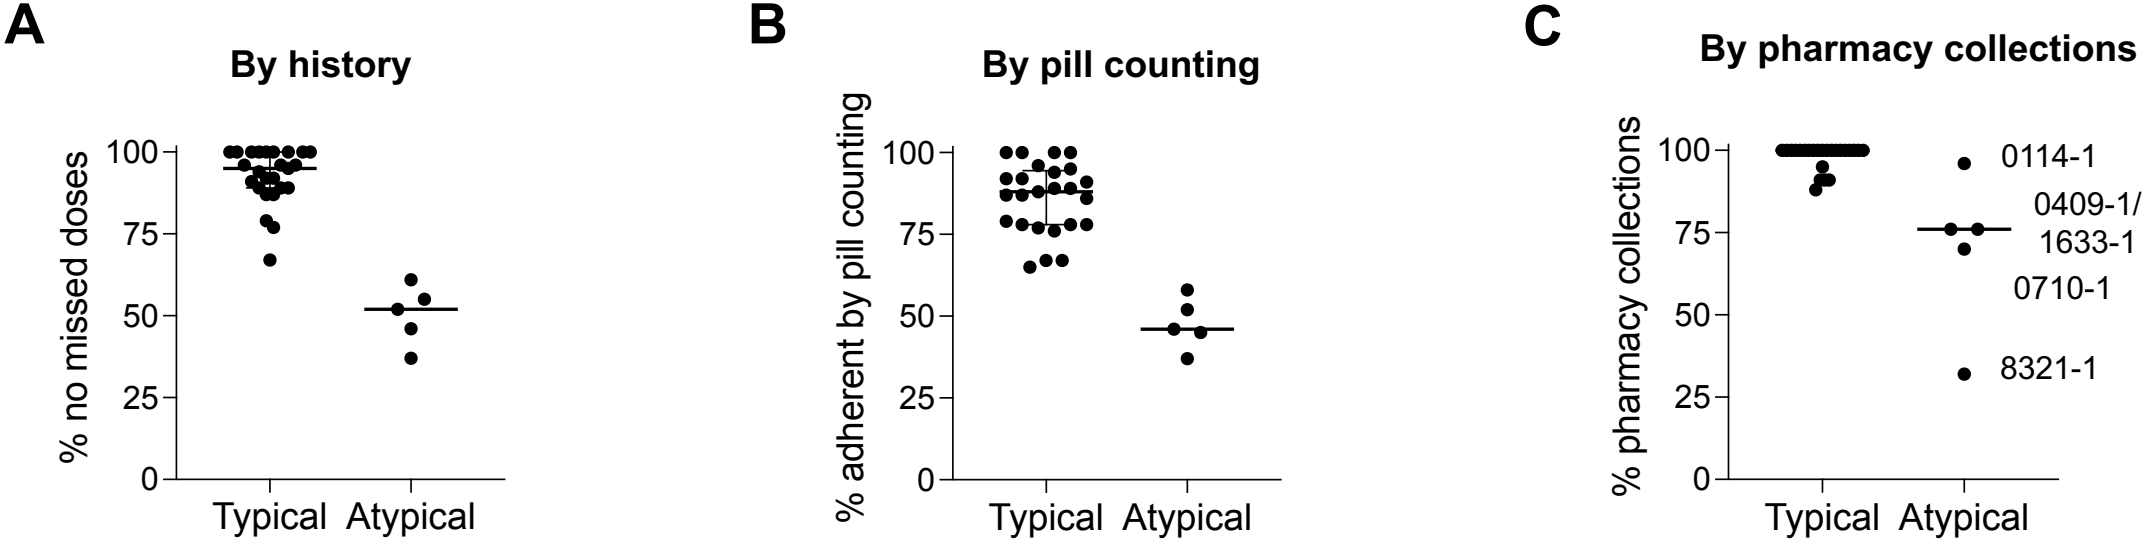

**Suppl Fig 2. cART adherence estimates by history, pill counting and pharmacy collections.** **A.** Percentage of timepoints at which no doses were missed according to history from the caregiver. **B.** Percentage of timepoints at which pill counting (volume of antiretroviral therapy) remaining corresponded to 100% cART adherence. In A-B, a missed clinic visit was counted as a timepoint when <100% cART adherence was achieved. **C.** Percentage of timepoints at which antiretroviral therapy was collected from the hospital pharmacy. In all panels, ‘Typical’ cases n=25, ‘Atypical’ cases n=5. Data for ‘Typical’ cases in panels A-B are presented as median and interquartile range.

Suppl Table 1

|                    | $\beta$ coefficient | p value |
|--------------------|---------------------|---------|
| Reference*         | 5.06                | n/a     |
| IFN- $\alpha$ IC50 | +0.78               | 0.014   |
|                    |                     |         |
| Reference*         | 4.65                | n/a     |
| IFN- $\beta$ IC50  | +0.76               | 0.003   |

\*Reference:  
pVL when maternal  $\log_{10}$  IC50 = 0

**Suppl Table 1. Univariate linear regression analyses performed to determine the impact of IFNa IC50 and IFNb IC50 on MoM pVL.** Univariate linear regression analyses were performed with  $\log_{10}$  (MoF pVL) as response and either  $\log_{10}$  (IFNa IC50) or  $\log_{10}$  (IFNb IC50) as covariate, respectively. The p values in this regression model were determined using two-sided Student *t*-tests.
